# Supplementary material for: Orai1–STIM1 Regulates Increased Ca2+ Mobilization, Leading to Contractile Duchenne Muscular Dystrophy Phenotypes in Patient-Derived Induced Pluripotent Stem Cells
Source: MDPI journal article supplement (doi:10.3390/biomedicines9111589), 2021-10-31
Supplement: s1 [file s1]

**Supplemental Table S1.** A list of primer sequences.

| <b>Gene</b> | <b>Fwd (5'-3')</b>   | <b>Rev (5'-3')</b>    |
|-------------|----------------------|-----------------------|
| CKM         | CATGGCCAAGGTACTGACC  | TGATGGGGTCAAAGAGTTCC  |
| Exo-MyoD    | CCCCTTCACCATGGAGCTA  | AGTGCTCTTCGGGTTTCAGG  |
| Endo-MyoD   | CACTCCGGTCCCAAATGTAG | TTCCCTGTAGCACCACACAC  |
| MHC         | GCAGATTGAGCTGGAAAAGG | TCAGCTGCTCGATCTCTTCA  |
| Myogenin    | TGGGCGTGTAAGGTGTGTAA | CGATGTACTGGATGGCACTG  |
| TBP         | GCTGGCCCATAGTGATCTTT | CATCTCCAGCACACTCTTCTC |
