# Supplementary material for: Orai1–STIM1 Regulates Increased Ca2+ Mobilization, Leading to Contractile Duchenne Muscular Dystrophy Phenotypes in Patient-Derived Induced Pluripotent Stem Cells
Source: MDPI journal article supplement (doi:10.3390/biomedicines9111589), 2021-10-31
Supplement: s1 [file s1]

## S-Figure.1

A

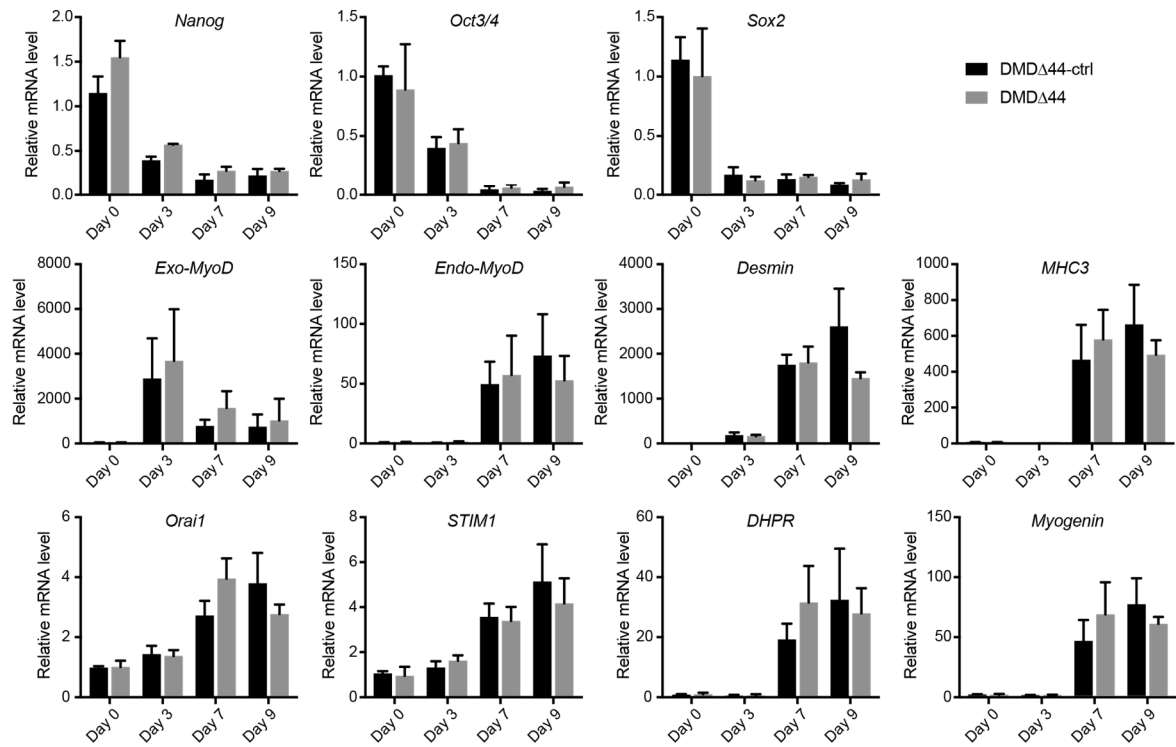

**Figure S1. Gene expression analyses of hiPSC-skeletal myotubes differentiated by the standard replating method.** (A) RT-qPCR analysis of *Nanog*, *Oct3/4*, *Sox2*, exogenous-*MyoD*, endogenous-*MyoD*, *Desmin*, *MHC2*, *Orai1*, *STIM1*, *DHPR* and *Myogenin* of DMD $\Delta$ 44-ctrl and DMD $\Delta$ 44 myotubes differentiated by the standard replating method. Data represent the mean  $\pm$  SD and were analyzed with an unpaired *t*-test from three biological replicates. \* indicates  $P < 0.05$ .

## S-Figure.2

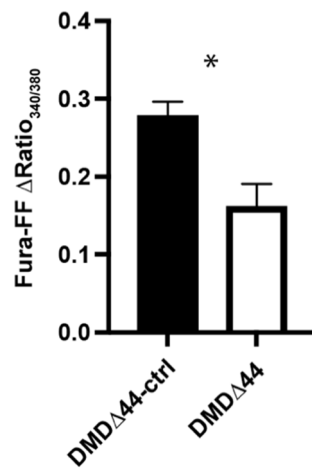

**Figure S1. Total releasable  $\text{Ca}^{2+}$  store content analyses of hiPSC-skeletal myotubes.** Data represent the mean  $\pm$  SD and were analyzed with an unpaired  $t$ -test from three biological replicates. \* indicates  $P < 0.05$ .

## S-Figure.3

A

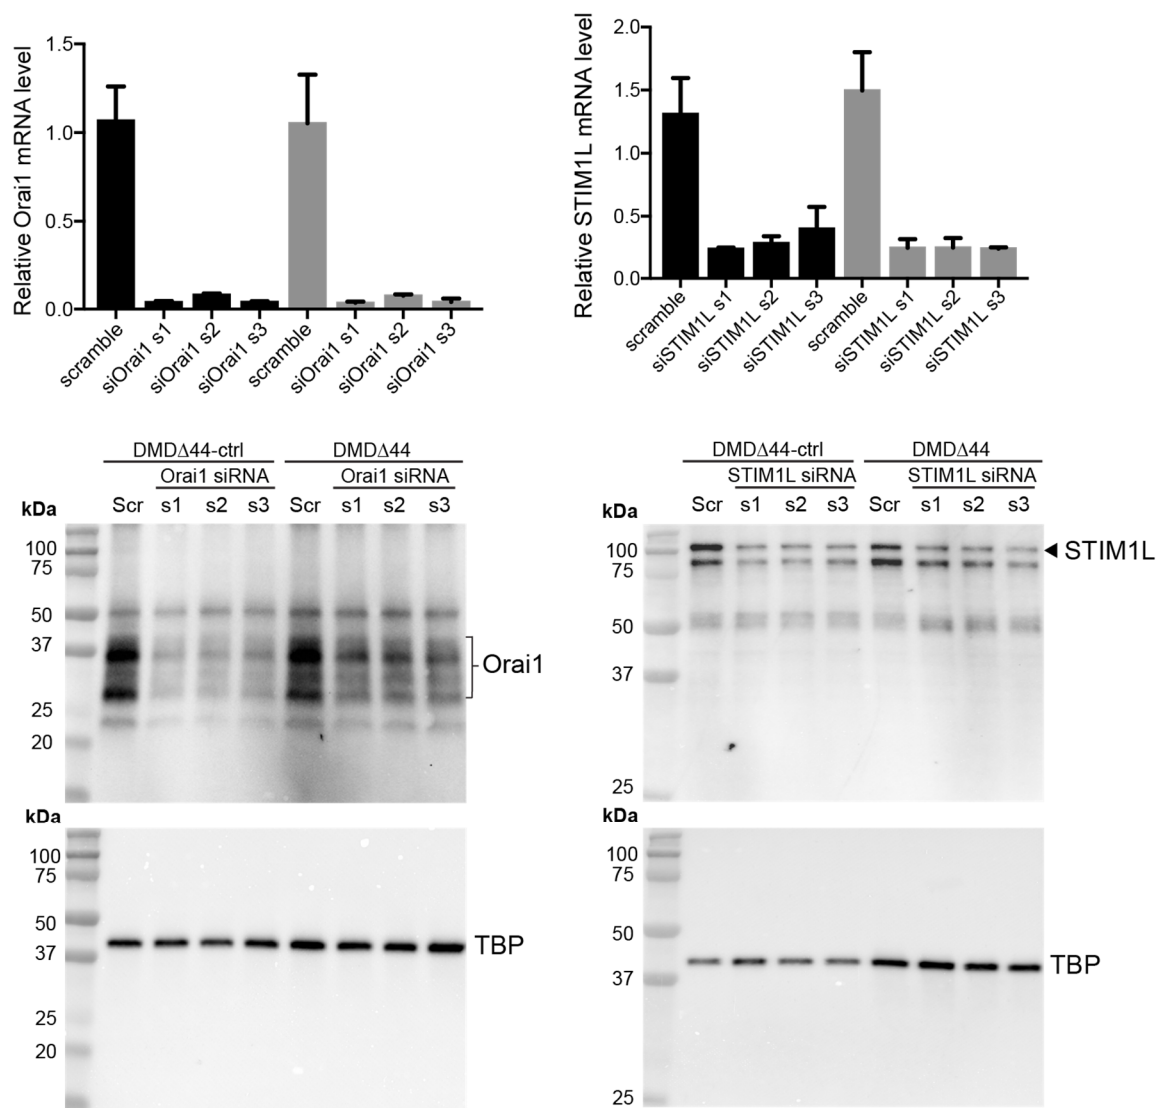

**Figure S3. siRNA-mediated Orai1 and STIM1L knock-down on differentiated myotubes by the modified replating.** siRNA-mediated Orai1 and STIM1 knock-down was confirmed by (A) RT-qPCR analysis and (B) Western blot.
